# Supplementary material for: Association Between Body Mass Index and All-Cause Death in Japanese Population: Pooled Individual Participant Data Analysis of 13 Cohort Studies
Source: PubMed Central journal article supplement (PMC6859077; doi:10.2188/jea.je20180124), 2019-12-05
Supplement: je-29-457-s001.pdf [file je-29-457-s001.pdf]

**eTable 1.** Clinical characteristics of total participants according to each cohort

| Cohort        | Number of participants | Sex men, n (%) | Age, years  | BMI, kg/m <sup>2</sup> | Current smoker, n (%) | Current drinker, n (%) | SBP, mm Hg   | DBP, mm Hg  | TC, mg/dL    |
|---------------|------------------------|----------------|-------------|------------------------|-----------------------|------------------------|--------------|-------------|--------------|
| Tanno-Sobetsu | 1,612                  | 745 (46.2%)    | 50.4 (6.8)  | 23.6 (3.1)             | 583 (36.2%)           | 606 (37.7%)            | 132.2 (19.6) | 82.1 (9.7)  | 190.3 (38.0) |
| Ohsaki        | 13,629                 | 6,504 (47.7%)  | 62.0 (9.6)  | 23.9 (3.1)             | 3,496 (25.7%)         | 6,272 (47.7%)          | 131.1 (17.6) | 78.6 (11.0) | 203.5 (35.1) |
| Ohasama       | 2,330                  | 928 (39.8%)    | 59.1 (10.0) | 23.6 (3.1)             | 500 (21.5%)           | 652 (28.0%)            | 131.1 (16.8) | 74.2 (10.9) | 197.8 (36.6) |
| Oyabe         | 4,692                  | 1,503 (32.0%)  | 58.8 (9.8)  | 23.0 (2.9)             | 898 (19.1%)           | 739 (15.8%)            | 127.8 (20.0) | 76.1 (11.2) | 195.7 (36.5) |
| YKK           | 4,872                  | 3,167 (65.0%)  | 50.7 (6.4)  | 22.4 (2.7)             | 1,889 (38.8%)         | 2,970 (61.0%)          | 118.6 (15.1) | 72.6 (11.8) | 197.5 (35.2) |
| SPMI          | 4,495                  | 1,932 (43.0%)  | 54.2 (8.1)  | 22.8 (2.9)             | 1,247 (27.7%)         | 2,039 (45.5%)          | 132.7 (17.6) | 80.2 (10.5) | 196.7 (35.5) |
| Suita         | 4,844                  | 2,301 (47.5%)  | 58.8 (10.7) | 22.6 (3.1)             | 1,385 (28.6%)         | 2,466 (51.1%)          | 129.5 (21.6) | 78.4 (12.0) | 210.6 (37.0) |
| RERF          | 4,203                  | 1,312 (31.2%)  | 61.0 (11.5) | 22.7 (3.5)             | 1,006 (23.9%)         | 1,895 (49.8%)          | 134.1 (22.4) | 82.4 (11.9) | 211.7 (39.2) |
| Hisayama      | 2,631                  | 1,113 (42.3%)  | 59.0 (11.7) | 22.8 (3.2)             | 661 (25.1%)           | 806 (30.7%)            | 133.7 (21.3) | 77.8 (11.3) | 206.7 (42.2) |
| JACC          | 27,479                 | 10,147 (36.9%) | 57.3 (9.7)  | 23.1 (3.1)             | 5,973 (21.7%)         | 10,659 (39.4%)         | 133.3 (19.4) | 79.2 (11.3) | 197.9 (36.8) |
| NIPPON DATA80 | 7,157                  | 3,147 (44.0%)  | 56.2 (10.9) | 22.8 (3.2)             | 2,271 (31.7%)         | 2,983 (41.7%)          | 140.3 (21.8) | 83.0 (12.2) | 191.8 (34.1) |
| NIPPON DATA90 | 6,013                  | 2,572 (42.8%)  | 57.3 (11.5) | 23.1 (3.2)             | 1,651 (27.5%)         | 1,703 (28.3%)          | 139.0 (20.5) | 82.8 (11.8) | 206.9 (38.5) |
| IPHS          | 96,030                 | 32,911 (34.3%) | 59.5 (10.3) | 23.5 (3.2)             | 19,544 (20.4%)        | 27,317 (28.4%)         | 133.7 (17.9) | 78.9 (10.7) | 202.3 (35.2) |
| Total         | 179,987                | 68,282 (37.9%) | 58.7 (10.3) | 23.3 (3.1)             | 41,104 (22.8%)        | 61,107 (34.2%)         | 133.1 (18.9) | 79.0 (11.2) | 201.3 (36.1) |

eTable 1 (continued).

| Cohort        | TG, mg/dL    | Follow-up period, years | Follow-up period, py | Number of deaths | Crude death rate, per 1,000 py |
|---------------|--------------|-------------------------|----------------------|------------------|--------------------------------|
| Tanno-Sobetsu | 95 (72-132)  | 18.6 (3.6)              | 30,061               | 151              | 5.0 (4.3-5.9)                  |
| Ohsaki        | 108 (75-161) | 6.0 (1.4)               | 81,929               | 708              | 8.6 (8.0-9.3)                  |
| Ohasama       | 115 (82-167) | 10.3 (2.5)              | 24,052               | 317              | 13.2 (11.8-14.7)               |
| Oyabe         | 111 (81-157) | 9.9 (1.7)               | 46,640               | 536              | 11.5 (10.6-12.5)               |
| YKK           | 89 (64-124)  | 11.1 (2.3)              | 53,867               | 89               | 1.7 (1.3-2.0)                  |
| SPMI          | 109 (77-156) | 9.2 (2.9)               | 41,189               | 211              | 5.1 (4.5-5.9)                  |
| Suita         | 104 (75-150) | 5.8 (1.8)               | 28,070               | 248              | 8.8 (7.8-10.0)                 |
| RERF          | 122 (89-174) | 14.8 (4.3)              | 62,009               | 1,508            | 24.3 (23.1-25.6)               |
| Hisayama      | 97 (70-141)  | 10.7 (2.9)              | 28,145               | 336              | 11.9 (10.7-13.3)               |
| JACC          | 101 (73-144) | 9.5 (2.0)               | 261,727              | 2,218            | 8.5 (8.1-8.8)                  |
| NIPPON DATA80 | N/A          | 16.7 (4.5)              | 119,736              | 1,937            | 16.2 (15.5-16.9)               |
| NIPPON DATA90 | 112 (79-165) | 9.5 (1.7)               | 56,910               | 697              | 12.2 (11.4-13.2)               |
| IPHS          | 118 (83-171) | 9.8 (1.8)               | 939,146              | 8,210            | 8.7 (8.6-8.9)                  |
| Total         | 113 (80-164) | 9.9 (3.1)               | 1,773,481            | 17,166           | 9.7 (9.5-9.8)                  |

BMI, body mass index; DBP, diastolic blood pressure; N/A, not assessed; py, person-years; SBP, systolic blood pressure; TC, total cholesterol; TG, Triglycerides.

Data are presented as mean (standard deviation), median (interquartile range) or as a number.

Crude death rates are presented with 95% confidence intervals.
